# Supplementary material
Source: HighWire-hosted journal article supplement (https://www.cmajopen.ca/highwire/filestream/81367/field_highwire_adjunct_files/2/2019-0084_original_submission.pdf)
Supplement: 2019-0084_original_submission.pdf [file 2019-0084_original_submission.pdf]

## A Cost Utility Analysis of Iron Deficiency Screening for Infants at 18 months

Sarah Carsley<sup>1,a</sup> PhD, Rui Fu<sup>2,a</sup> MSc, Cornelia M. Borkhoff<sup>2,3,4</sup> PhD, Nadine Reid PhD<sup>2</sup>, Eva Baginska<sup>2</sup> MBA, Catherine S. Birken<sup>2-4,6</sup> MD MSc, Jonathon L. Maguire<sup>2,4-6</sup> MD MSc, Rebecca Hancock-Howard<sup>2</sup> PhD, Patricia C. Parkin<sup>2,3,4b</sup> MD, and Peter C. Coyte<sup>2,b</sup> PhD

### Affiliations:

<sup>1</sup>Health Promotion, Chronic Disease and Injury Prevention, Public Health Ontario, Toronto, Ontario

<sup>2</sup>Institute of Health Policy, Management and Evaluation, Dalla Lana School of Public Health, University of Toronto, Toronto, Ontario

<sup>3</sup>Child Health Evaluative Sciences, Peter Gilgan Centre for Research and Learning, the Hospital for Sick Children, Toronto, Ontario

<sup>4</sup>Division of Pediatric Medicine and the Pediatric Outcomes Research Team (PORT), Department of Pediatrics, University of Toronto Faculty of Medicine, The Hospital for Sick Children, Toronto, Ontario

<sup>5</sup>Department of Pediatrics, St. Michael's Hospital and Li Ka Shing Knowledge Institute, Toronto, Ontario

<sup>6</sup>Department of Nutritional Sciences, University of Toronto, Toronto, Canada

<sup>a</sup>These authors contributed equally as co-first authors.

<sup>b</sup>These authors contributed equally as co-senior authors.

### Corresponding Author:

Sarah Carsley  
Public Health Ontario  
480 University Avenue, Suite 300  
Toronto, ON, M5G 1V2  
Tel: 647-260-7710  
Email: [sarah.carsley@oahpp.ca](mailto:sarah.carsley@oahpp.ca)

**Word count (excluding abstract, tables, figures and references):** 3514

**Word count (abstract):** 247

**Funding Source:** The OptEC study is supported by a grant from Canadian Institutes of Health Research (FRN # 115059); the Pediatric Outcomes Research Team (PORT) is supported by a grant from the Hospital for Sick Children Foundation.

**Financial Disclosure:** PCP reports receiving the following related to this study: a grant from Canadian Institutes of Health Research (FRN # 115059) for an ongoing investigator-initiated trial of iron deficiency in young children, for which Mead Johnson Nutrition provides non-financial support (Fer-In-Sol® liquid iron supplement) (2011-2017), and a grant from the

1  
2  
3 Hospital for Sick Children Foundation; and the following peer-reviewed grants for completed  
4 investigator-initiated studies unrelated to this study from Danone Institute of Canada (2002-2004  
5 and 2006-2009), and Dairy Farmers of Ontario (2008-2010). These agencies had no role in the  
6 design, collection, analyses or interpretation of the results of this study or in the preparation,  
7 review, or approval of the manuscript. EB is the current Director of Health Economics and  
8 Outcomes Research at BD-Canada and at the time of this study was a PhD student at the Institute  
9 of Health Policy, Management and Evaluation. BD-Canada sells phlebotomy supplies, however  
10 BD-Canada had no role in the design, collection, analyses or interpretation of the results of this  
11 study or in the preparation, review, or approval of the manuscript. The other authors have  
12 indicated they have no financial relationships relevant to this article to disclose.  
13  
14  
15  
16  
17

18 **Conflict of Interest:** The authors have indicated they have no potential conflicts of interest to  
19 disclose.  
20  
21  
22  
23  
24  
25  
26  
27  
28  
29  
30  
31  
32  
33  
34  
35  
36  
37  
38  
39  
40  
41  
42  
43  
44  
45  
46  
47  
48  
49  
50  
51  
52  
53  
54  
55  
56  
57  
58  
59  
60

Confidential

## ABSTRACT

**Background:** Iron deficiency (ID) is the world's most prevalent micronutrient disorder, with a peak prevalence in children six months to three years of age, a sensitive period for neurodevelopment. Previous studies show that chronic, severe ID may result in poor cognitive and functional outcomes. The study objective was to examine the cost-utility of a proposed ID screening program for 18-month old infants.

**Methods:** A decision tree model was used to estimate the costs (in 2019 Canadian dollars, where \$1.00CAD=\$0.75USD) and quality-adjusted life years (QALYs) associated with three ID screening strategies: no screening; universal screening; and targeted screening for a high-risk population. A societal perspective was used and lifetime QALY gains were assessed. Outcomes and costs were derived from the literature and prospectively collected data. One-way and probabilistic sensitivity analyses were performed to assess parameter uncertainty.

**Results:** Compared with no screening, the incremental costs to society of universal and targeted screening programs were \$2286.06/QALY and \$1676.94/QALY, respectively. Using a willingness-to-pay threshold of \$50,000/QALY, both programs were cost-effective. Compared with a targeted screening program, a universal screening program would cost an additional \$2965.96 to gain one QALY, rendering it a cost-effective option. The study findings were robust to extensive sensitivity analyses.

**Interpretation:** A proposed universal screening program for ID was cost-effective over the lifespan compared with both no screening (current standard of care) and a targeted screening program for high-risk infants. Policy makers and physicians may consider expanding the recommended 18-month Enhanced Well-Baby Visit to include screening for ID.

## INTRODUCTION

Iron deficiency (ID) is the world's most prevalent micronutrient disorder, with a peak prevalence in children six months to three years of age.<sup>1</sup> Early childhood is a sensitive period for neurodevelopment, and overlaps with a period of rapid growth and transitions in feeding, which may result in inadequate daily iron intake.<sup>2</sup> In developed countries, the prevalence of ID in young children is approximately 10-15%; ID may progress to anemia (iron deficiency anemia, IDA) with a prevalence of approximately 2%.<sup>3,4</sup>

ID in infancy is associated with neurocognitive deficits, which may persist into adulthood. For example, Lozoff and colleagues followed a cohort of Costa Rican infants (mean age 17 months) through to 25 years of age.<sup>5-9</sup> Compared with those who were iron sufficient in infancy (either before and/or after iron therapy), those with chronic, severe ID in infancy demonstrated poor long-term neurocognitive outcomes (such as lower cognitive scores) and functional outcomes (such as grade repetition, referral for special services, and poor school completion). Animal models support these findings; recent studies in piglets demonstrate that early life ID results in reduced brain volumes and microstructural changes, as well as cognitive deficits.<sup>10-12</sup>

The current standard of care for children identified with iron deficiency anemia (IDA) is treatment with oral iron for three to six months, which is effective in increasing the hemoglobin concentration.<sup>13</sup> Two randomized trials (one in infants with IDA, another in infants with non-anemic ID) suggest that treatment with oral iron also improves developmental outcomes.<sup>14,15</sup> Given the potential for non-anemic ID to progress to IDA, early detection and intervention, particularly through diet advice and/or oral iron treatment, may be beneficial.<sup>16</sup>

1  
2  
3  
4  
5  
6  
7  
8  
9  
10  
11  
12  
13  
14  
15  
16  
17  
18  
19  
20  
21  
22  
23  
24  
25  
26  
27  
28  
29  
30  
31  
32  
33  
34  
35  
36  
37  
38  
39  
40  
41  
42  
43  
44  
45  
46  
47  
48  
49  
50  
51  
52  
53  
54  
55  
56  
57  
58  
59  
60

There is no current Canadian recommendation for screening for ID. The American Academy of Pediatrics (AAP) recommends universal screening for anemia through measurement of hemoglobin at 12 months of age.<sup>2</sup> However, screening for anemia has limitations, as the rapidly developing brain may be exposed to chronic ID by the time anemia is detected.<sup>17</sup> We recently assessed a screening strategy for ID using serum ferritin in 1,735 Canadian children, aged one to three years, attending primary care.<sup>18</sup> Our results supported serum ferritin, rather than hemoglobin, as a more promising screening test for ID and an optimal time for screening at 15 to 18 months. The Canadian Paediatric Society (CPS) recommends an 18-month Enhanced Well-Baby Visit (EWBV) which has been implemented in the Province of Ontario with physician incentives and would be an ideal opportunity to screen for ID.<sup>19,20</sup> However, it is recognized that the cost of screening for ID using serum ferritin has not yet been assessed.<sup>21</sup>

The purpose of this analysis was to model the long-term cost-utility of a proposed screening program for ID using serum ferritin in 18 month old infants during a scheduled health supervision visit in the general population and in a targeted high-risk population in Ontario, Canada.

## **METHODS**

### **Target Population**

The target population for this cost-utility analysis was infants 18 months of age attending a scheduled 18-month EWBV.

### **Model Structure**

A decision tree model (Figure 1) was used to estimate the costs and quality-adjusted life years (QALYs) to obtain incremental cost-effectiveness ratios (ICERs) associated with three ID screening strategies, including 1) no screening; 2) a universal screening program; and 3) a

1  
2  
3 targeted screening program for a high-risk population (see below). With the understanding that  
4  
5 ID during the sensitive period for neurodevelopment may lead to long-term poor functional  
6  
7 outcomes, a lifetime time horizon was chosen in our analysis.<sup>22,23</sup>  
8  
9

10 The model included health states at four terminal nodes, including: 1) “Healthy,  
11  
12 untreated”: if ID was not present and treatment unnecessary, 2) “Healthy, after treatment”: if ID  
13  
14 was detected and treated successfully, 3) “Poor functional outcomes, after treatment”: if ID was  
15  
16 detected and treatment was unsuccessful, and 4) “Poor functional outcomes, untreated”: if ID  
17  
18 was not detected and not treated. The analysis was conducted from a societal perspective,  
19  
20 wherein all costs irrespective of payer were included. An annual discounting rate of 1.5% was  
21  
22 used to adjust costs and outcomes to current values, based on the Canadian Agency for Drugs  
23  
24 and Technologies in Health (CADTH) guidelines.<sup>23</sup> Analyses were performed using TreeAge Pro  
25  
26 Software 18.2.1(Williamstown, MA). We followed guidelines for economic evaluations of  
27  
28 newborn screening.<sup>24</sup>  
29  
30  
31  
32

### 33 **Data Sources**

34  
35 We populated the model with data from the literature and prospectively collected data  
36  
37 from our ongoing study called ‘Optimizing Early Child Development in the Primary Care  
38  
39 Practice Setting’ (OptEC Study), which is described in a study protocol.<sup>16</sup> This study is  
40  
41 embedded in our pediatric primary care research network called *TARGET Kids!*  
42  
43 ([www.targetkids.ca](http://www.targetkids.ca)).<sup>3</sup> The recruitment process for the OptEC study simulates our proposed ID  
44  
45 screening program because blood is obtained from young children attending a scheduled health  
46  
47 supervision visit in primary care. Laboratory measures include complete blood count (CBC,  
48  
49 including hemoglobin), serum ferritin, and C-reactive protein (CRP).  
50  
51  
52  
53

### 54 **Base Case Model Inputs**

### ***Prevalence of ID***

The prevalence of ID in the general and high-risk infant populations was derived from data from the OptEC study (Table 1). High-risk infants were defined as those with two or more risk factors for ID, about 35.5% of the total population.<sup>25-33</sup> In the base-case analysis, ID was defined as a serum ferritin <12 µg/L, as recommended by the World Health Organization and the American Academy of Pediatrics.<sup>2,34</sup> In the sensitivity analysis, ID was defined as a serum ferritin <18 µg/L, a cut-off derived from our recent analysis of data from the OptEC study (Supplementary Table 1).<sup>16</sup>

### ***Sensitivity and specificity of the screening test***

Under both screening strategies, we proposed screening for ID using serum ferritin, a commonly available test. Guyatt et al. analyzed data from 55 studies in adults that examined laboratory tests of iron status and histologic examination of bone marrow.<sup>35</sup> The authors concluded that serum ferritin is the most accurate test for the diagnosis of ID. As there is no similar study in children, we used estimates from the study by Guyatt et al.

### ***Probability of poor functional outcomes***

Poor functional outcomes were considered either a direct consequence of ID or due to causes other than ID. We also considered whether or not the infants with ID received treatment with oral iron. The estimates used for our base case came from two published randomized controlled trials and a long-term observational study (see Table 1).

Many studies demonstrate that before treatment, ID in infancy is associated with poor neurodevelopmental and functional outcomes.<sup>5,14,15</sup> To estimate the probability of poor functional outcomes in children with ID in infancy without treatment, we referred to data from the long-term studies by Lozoff and colleagues.<sup>6,9</sup> At 10 years of age, Lozoff et al. reported that

1  
2  
3 children with chronic, severe ID in infancy, compared with children with good iron status in  
4 infancy, had higher rates of grade repetition (26% vs 12%) and referral for special services (21%  
5 vs 7%).<sup>6</sup> We used the average of these rates as estimates of the probability of poor functional  
6 outcomes in children with untreated ID (23.5%) and due to causes other than ID (9.5%). These  
7 estimates were more conservative than reported by Lozoff et al. in the same cohort at 25 years of  
8 age, when rates of incompleteness of secondary school were compared (58% vs 20%).<sup>9</sup>

9  
10 To estimate the probability of poor functional outcomes in children with ID in infancy  
11 with treatment, we referred to data from the randomized trials of infants with IDA and non-  
12 anemic ID, which found that mental development scores reversed in those receiving four months  
13 of oral iron, compared with placebo.<sup>14,15</sup> Therefore, we used the same rate as for children with  
14 good iron status in the cohort followed by Lozoff and colleagues (9.5%).<sup>6</sup>

### 15 *Utility Scores*

16  
17 A QALY encompasses both quality and duration of life, and is calculated by multiplying  
18 the utility score by life expectancy. Calculations of lifetime QALYs under the four terminal  
19 nodes are detailed in Table 1 and 2. We assumed that cognitive deficits beginning in infancy  
20 leading to poor functional outcomes in adulthood does not lead to early mortality; therefore, we  
21 assumed all children to have an 80.5-year life expectancy at 18-months of age.<sup>36</sup>

22  
23 A utility score of 1.0 was assigned to healthy children not requiring treatment. A utility  
24 score of 0.84 was assigned to children with poor functional outcomes. This was derived from the  
25 average of two sources. First, a median utility of 0.87 was reported in a study of parents to young  
26 children, three to 36 months of age, in which parents were presented with a scenario describing a  
27 child's illness, and resulting poor functional outcomes such as problems with learning,  
28 behavioural, attentional, or social skills, and slightly lower intelligence.<sup>37</sup> Second, a mean utility  
29



1  
2  
3 of 0.82 was found in a study of adults for mild cognitive impairment using the Clinical Dementia  
4 Rating scale vignettes in combination with time trade-off questions.<sup>38</sup>  
5  
6

7  
8 Treatment of ID with oral iron supplementation may be associated with minor  
9 gastrointestinal adverse events such as abdominal pain, vomiting, diarrhea, or constipation.<sup>13</sup>  
10  
11 Therefore, a utility score of 0.815 was assigned to a 4-month treatment period.<sup>39</sup> A median utility  
12  
13 of 1.0 has previously been identified for venipuncture, when parents were presented a scenario in  
14  
15 which poor functional outcomes were possible; therefore, this was not included in the model.<sup>37</sup>  
16  
17  
18

### 19 ***Costs***

20  
21 Both direct and indirect costs were considered in our analysis (Table 1). The direct  
22  
23 medical cost of the screening test was obtained from the Ontario Health Insurance Plan (OHIP)  
24  
25 Laboratory Test Schedule of Benefits (effective April 2017)<sup>40</sup> and was adjusted to present value  
26  
27 (January 2019) using the Canadian Consumer Price Index.<sup>41</sup> Although screening for ID may be  
28  
29 based on serum ferritin alone, in order to derive a conservative cost estimate for the screening  
30  
31 test, we included the additional cost for both hemoglobin and CRP (CRP is recommended by the  
32  
33 AAP to exclude the possibility of acute inflammation). In the base-case analysis, we assumed an  
34  
35 urban location for the calculation of the specimen collection fee under both screening strategies.  
36  
37  
38 Alternative patient locations that were associated with different fees were assessed in sensitivity  
39  
40 analyses. The unit price of the targeted screening program was \$6.52 more expensive (Table 1)  
41  
42 than the universal strategy to account for increased clinician time (20 minutes instead of 10  
43  
44 minutes) to identify infants at risk. Direct treatment cost of a four month period of a commonly  
45  
46 prescribed oral iron supplement (ferrous sulfate) was estimated from Ontario Drug Benefit  
47  
48 Formulary/Comparative Drug Index (\$170.00 including a pharmacy dispensing fee).<sup>42</sup>  
49  
50  
51  
52  
53  
54  
55  
56  
57  
58  
59  
60

1  
2  
3 We included the indirect (or time) cost paid by parents to attend a laboratory for  
4  
5 phlebotomy (Table 1). Estimation of salary loss was based on Statistics Canada labour statistics  
6  
7 on the average weekly wage in January 2019 and 0.5-days off work.<sup>43</sup> Parents were assumed to  
8  
9 drive to the laboratory and park for two hours. Arrival by public transportation and taking up to a  
10  
11 full day off work were considered in sensitivity analyses.  
12  
13

14 We did not include the cost of the 18-month visit, as this visit is currently recommended  
15  
16 for all infants and is covered by the Ontario Health Insurance Plan. To be conservative, we did  
17  
18 not include direct or indirect lifetime costs of poor functional outcomes.  
19  
20

### 21 **Sensitivity analysis**

22  
23 Extensive one-way sensitivity analyses were conducted to assess the uncertainty of the  
24  
25 ICERs by varying the single-parameter values according to the ranges presented in Supplemental  
26  
27 Table 1. Probabilistic sensitivity analyses using 100,000 Monte Carlo simulations was performed  
28  
29 to assess the simultaneous uncertainty around multiple variables using distributions specified in  
30  
31 Supplemental Table 2.  
32  
33

## 34 **RESULTS**

### 35 **Base case**

36  
37 We considered a group of average-risk and at-risk 18-month-old infants where: the  
38  
39 prevalence of ID among average-risk infants was 12.1%; the prevalence of ID among at-risk  
40  
41 infants was 25.0%; the proportion of at-risk infants in the population was 35.5%. The cost of  
42  
43 each screening strategy per child was \$144.81 for universal, screen negative; \$314.81 for  
44  
45 universal, screen positive; \$151.33 for targeted, screen negative; \$321.33 for targeted, screen  
46  
47 positive; and \$0.00 for no screening. Results of the base-case analysis for the two screening  
48  
49 strategies compared with no screening, as well as the base-case comparison between the  
50  
51  
52  
53  
54  
55  
56  
57  
58  
59  
60

1  
2  
3 universal and the targeted screening program are presented in Table 3. Compared with no  
4 screening, a universal and a targeted screening program cost society an additional \$162.98 and  
5 \$63.06, respectively, in exchange for 0.07 and 0.04 QALY gains in a lifetime (Figure 2). The  
6 ICER for the universal and the targeted screening programs relative to no screening was  
7 \$2,286.06/QALY and \$1,676.94/QALY, respectively. Using two common willingness-to-pay  
8 thresholds of \$50,000 and \$100,000 per QALY,<sup>44</sup> both screening strategies were cost-effective  
9 over no screening. Compared with the targeted program, the universal program was \$99.96 more  
10 expensive while producing 0.03 additional QALYs in a lifetime, giving an ICER of  
11 \$2,965.96/QALY. Therefore, the universal screening program is considered cost-effective  
12 compared with the targeted program.  
13  
14  
15  
16  
17  
18  
19  
20  
21  
22  
23  
24  
25

## 26 **Sensitivity analyses**

### 27 ***One-way sensitivity analyses***

28  
29  
30  
31 Tornado diagrams that demonstrate the results of the one-way sensitivity analyses can be  
32 seen in Figure 3. The base-case conclusions were robust to all single-parameter variations. When  
33 the probability of ID-associated poor functional outcomes was as low as 8.4%, the ICER of a  
34 universal and targeted screening programs reached \$11,679.36/QALY and \$8,888.30/QALY,  
35 respectively compared with no screening (Figure 3), still far below the threshold of  
36 \$50,000/QALY. When comparing the universal program to the targeted program, the ICER  
37 peaked at \$14,565.99/QALY. The most impactful parameter was the probability of ID-associated  
38 poor functional outcomes (Figure 3).  
39  
40  
41  
42  
43  
44  
45  
46  
47  
48

### 49 ***Probabilistic sensitivity analyses***

50  
51  
52 Probabilistic sensitivity analyses comparing the cost-utility of universal screening to no  
53 screening, targeted screening to no screening, and universal screening to targeted screening are  
54  
55  
56  
57  
58  
59  
60

1  
2  
3 presented in Figure 3. The analysis showed that 98.8% and 99.0% of the time, the ICER for  
4 universal screening or targeted screening as compared with no screening would be below the  
5 threshold of \$50,000. When comparing a universal screening strategy to targeted screening, the  
6 former was cost-effective 98.5% of the time.  
7  
8  
9  
10

## 11 **INTERPRETATION**

12  
13  
14 Our findings suggest that a universal screening program for ID can be a cost-effective  
15 strategy compared with the current practice of no screening. In the base case, the universal  
16 screening program was also cost-effective compared with a targeted screening program of high-  
17 risk infants. These results were robust to extensive one-way and probability sensitivity analyses.  
18  
19 Using two common willingness-to-pay thresholds of \$50,000 and \$100,000 per QALY, both  
20 screening strategies were cost-effective over no screening.<sup>44</sup>  
21  
22  
23  
24  
25  
26  
27

28 In our analysis, we assumed that no further costs were incurred as a result of poor  
29 functional outcomes. This assumption is conservative, as there may be direct and/or indirect  
30 costs associated with public or private developmental or educational assessments and  
31 interventions for individuals with developmental difficulties, which may be incurred at any time  
32 during their pre-school, school-age and adult years. In our model, once the present value of the  
33 lifetime cost associated with poor functional outcomes exceeded \$12,000, both screening  
34 programs would be cost-saving compared with no screening.  
35  
36  
37  
38  
39  
40  
41  
42  
43

44 We identified one published economic analysis of anemia prevention conducted by  
45 Shaker et al. in infants 9 to 12 month of age, set in the US where anemia screening (with  
46 hemoglobin) is currently recommended.<sup>45</sup> The authors concluded that screening using an  
47 alternative test called reticulocyte hemoglobin content was an affordable strategy as compared  
48 with hemoglobin alone. Their analysis differed from our analysis in several ways. First, Shaker  
49 et al. did not include a 'no screening' strategy. Second, whereas Shaker et al. used reticulocyte  
50  
51  
52  
53  
54  
55  
56  
57  
58  
59  
60

1  
2  
3 hemoglobin content as their screening test, we used serum ferritin, which is a test that is more  
4  
5 widely available and well-known to physicians.<sup>2</sup> Third, we proposed screening at 18 months of  
6  
7 age while Shaker et al. proposed screening at nine to 12 months. We selected the 18-month visit  
8  
9 as our previous analysis found that serum ferritin is lowest between 15 and 24 months, and that  
10  
11 hemoglobin does not change significantly between 12 and 24 months.<sup>18</sup> Finally, Shaker et al.  
12  
13 included the cost of one year of supplemental health care use for children with untreated ID,  
14  
15 whereas we did not.  
16  
17  
18

19         The goal of screening for ID is early detection and treatment before progression to  
20  
21 chronic, severe ID or IDA. A Cochrane systematic review identified eight trials of iron treatment  
22  
23 in young children with IDA; however, only one study used a duration of treatment (four months)  
24  
25 consistent with current standard of care.<sup>46</sup> This randomized trial found that developmental scores  
26  
27 were reduced in the infants with IDA before treatment, and reversed after iron treatment  
28  
29 (compared with placebo), with follow-up scores similar to healthy children with iron  
30  
31 sufficiency.<sup>15</sup> Another randomized trial in infants with non-anemic ID similarly found that  
32  
33 developmental scores were reduced before treatment, and improved after iron treatment.<sup>14</sup> The  
34  
35 observational studies by Lozoff and colleagues, who followed a cohort of Costa Rican children  
36  
37 to 25 years of age, found that those with chronic, severe ID in infancy demonstrated poor long-  
38  
39 term cognitive and functional outcomes, as compared with those who were iron sufficient in  
40  
41 infancy (either before and/or after iron therapy).<sup>5-9</sup> Together, this body of literature suggests that  
42  
43 early detection of ID followed by a good response to oral iron treatment may lead to more  
44  
45 favourable outcomes; and late detection of ID may be accompanied by slow response to oral iron  
46  
47 treatment and poor long-term outcomes.  
48  
49  
50  
51  
52  
53  
54  
55  
56  
57  
58  
59  
60

1  
2  
3 Both universal and targeted screening for ID were cost-effective in our analysis.  
4  
5 However, for the targeted screening program, the results suggest that the costs saved by  
6  
7 restricting the program to high-risk infants is offset by the loss of QALYs for unscreened  
8  
9 average-risk children. This is likely driven by the small incremental cost difference between the  
10  
11 universal and the targeted program (about \$100). Because a universal program will always  
12  
13 produce more QALYs, it is important to consider the cost of the QALYs gained. In our analysis,  
14  
15 the incremental cost was about \$100 (\$99.92). In other words, an additional \$100 spent would be  
16  
17 exchanged for a \$1,500 worth of effectiveness ( $0.03 \text{ extra QALYs} * \$50,000/\text{QALY} = \$1,500$ ),  
18  
19 which is highly cost-effective.  
20  
21  
22  
23

24 Strong recommendations have been made for investment in early childhood, considering  
25  
26 the evidence supporting the developmental origins of health and disease. Nobel Prize winning  
27  
28 University of Chicago Economics Professor James Heckman developed the ‘Heckman equation’,  
29  
30 which describes a high return on investment for preventive initiatives early in the life course.<sup>47-49</sup>  
31  
32 In keeping with this theory, screening and treatment for ID in early childhood has the potential to  
33  
34 improve outcomes throughout the life course, with a modest economic investment.  
35  
36  
37

38 The Canadian Paediatric Society, in a position statement supported by the College of  
39  
40 Family Physicians of Canada, recommends an 18-month Enhanced Well-Baby Visit (EWBV),  
41  
42 with the overall goal of “strengthening the early childhood development system across Canada  
43  
44 through a series of activities.”<sup>20</sup> The Province of Ontario has implemented this visit and provided  
45  
46 physician fee incentives.<sup>19</sup> This would be an ideal visit at which to add screening for ID, and is  
47  
48 aligned with the goal of improving child developmental outcomes. In the context of a primary  
49  
50 care practice setting, treatment of ID with diet advice and prescription of oral iron is feasible and  
51  
52 utilizes the expertise of physicians and other members of the health care team.  
53  
54  
55  
56  
57  
58  
59  
60

1  
2  
3  
4  
5  
6  
7  
8  
9  
10  
11  
12  
13  
14  
15  
16  
17  
18  
19  
20  
21  
22  
23  
24  
25  
26  
27  
28  
29  
30  
31  
32  
33  
34  
35  
36  
37

There are several recognized limitations of cost-effectiveness analyses.<sup>50,51</sup> The main limitation of our analysis relates to the assumptions for the model and source of the data. Specifically, there were no sources to estimate the sensitivity and specificity of serum ferritin in children (therefore, data from adults was used) and ID-specific utility scores (therefore, data from similar scenarios was used). Sources to estimate the probability of poor functional outcomes were methodologically strong and included randomized controlled trials and a long-term observational study; however, these studies were conducted in developing countries. Further, we did not include future costs that might be incurred as a result of poor functional outcomes due to inadequate data sources, leading to a conservative estimate of costs. However, the inclusion of these costs would increase the cost-effectiveness of the two screening programs compared with no screening. Despite these limitations, our findings were robust following extensive sensitivity analyses and were largely driven by the low cost of the screening test and treatment; the short duration of the treatment; the low reduction of life quality associated with the potential side effect of receiving the treatment; and the probability of an important functional outcome over a long time horizon.

38  
39  
40  
41  
42  
43  
44  
45  
46  
47  
48

The guidelines for economic evaluations of newborn screening recommend discussing ethical and distributional issues.<sup>24</sup> We believe there are fewer ethical issues associated with screening for ID at 18 months of age as compared with screening for rare metabolic diseases in newborns. Considering the distribution of costs and benefits, given the possible association between social determinants and ID,<sup>7</sup> screening has the potential to reduce health disparities.

49  
50  
51  
52  
53  
54  
55  
56  
57  
58  
59  
60

There are several opportunities for future research. These include understanding the values and preferences of parents and practitioners for screening for ID; development of a risk stratification tool that could be used as a component of targeted screening (similar to tools used

1  
2  
3 for assessing risk of diabetes in adults);<sup>52</sup> and validation of a point-of-care tool for serum ferritin  
4  
5 to improve convenience and reduce cost.<sup>21,53</sup>  
6

7  
8 In summary, a proposed universal screening program for ID was cost-effective over the  
9  
10 lifespan compared with both no screening (current standard of care) and a targeted screening  
11  
12 program for high-risk infants. Policy makers and physicians may consider expanding the  
13  
14 recommended 18-month EWBV to include screening for ID.  
15  
16  
17  
18  
19  
20  
21  
22  
23  
24  
25  
26  
27  
28  
29  
30  
31  
32  
33  
34  
35  
36  
37  
38  
39  
40  
41  
42  
43  
44  
45  
46  
47  
48  
49  
50  
51  
52  
53  
54  
55  
56  
57  
58  
59  
60

Confidential



## References

1. World Health Organization. Iron Deficiency Anemia Assessment, Prevention and Control: A guide for programme managers. Geneva, Switzerland: World Health Organization, 2001. <[http://whqlibdoc.who.int/hq/2001/WHO\\_NHD\\_01.3.pdf](http://whqlibdoc.who.int/hq/2001/WHO_NHD_01.3.pdf)> (Accessed on November 30, 2018).
2. Baker RD, Greer FR. Diagnosis and prevention of iron deficiency and iron-deficiency anemia in infants and young children (0-3 years of age). *Pediatrics* 2010;126:1040-50.
3. Carsley S, Borkhoff CM, Maguire JL, et al. Cohort Profile: The Applied Research Group for Kids (TARGet Kids!). *International Journal of Epidemiology* 2015;44:776-88.
4. Gupta PM, Hamner HC, Suchdev PS, Flores-Ayala R, Mei Z. Iron status of toddlers, nonpregnant females, and pregnant females in the United States. *The American Journal of Clinical Nutrition* 2017;106:1640s-6s.
5. Lozoff B, Brittenham GM, Wolf AW, et al. Iron deficiency anemia and iron therapy effects on infant developmental test performance. *Pediatrics* 1987;79:981-95.
6. Lozoff B, Jimenez E, Hagen J, Mollen E, Wolf AW. Poorer behavioral and developmental outcome more than 10 years after treatment for iron deficiency in infancy. *Pediatrics* 2000;105:E51.
7. Lozoff B, Jimenez E, Smith JB. Double burden of iron deficiency in infancy and low socioeconomic status: a longitudinal analysis of cognitive test scores to age 19 years. *Archives of Pediatrics & Adolescent Medicine* 2006;160:1108-13.
8. Lozoff B, Jimenez E, Wolf AW. Long-term developmental outcome of infants with iron deficiency. *The New England Journal of Medicine* 1991;325:687-94.
9. Lozoff B, Smith JB, Kaciroti N, Clark KM, Guevara S, Jimenez E. Functional significance of early-life iron deficiency: outcomes at 25 years. *The Journal of Pediatrics* 2013;163:1260-6.
10. Antonides A, Schoonderwoerd AC, Scholz G, Berg BM, Nordquist RE, van der Staay FJ. Pre-weaning dietary iron deficiency impairs spatial learning and memory in the cognitive holeboard task in piglets. *Frontiers in Behavioral Neuroscience* 2015;9:291.
11. Mudd AT, Fil JE, Knight LC, Dilger RN. Dietary Iron Repletion following Early-Life Dietary Iron Deficiency Does Not Correct Regional Volumetric or Diffusion Tensor Changes in the Developing Pig Brain. *Frontiers in Neurology* 2017;8:735.
12. Mudd AT, Fil JE, Knight LC, Lam F, Liang ZP, Dilger RN. Early-Life Iron Deficiency Reduces Brain Iron Content and Alters Brain Tissue Composition Despite Iron Repletion: A Neuroimaging Assessment. *Nutrients* 2018;10.
13. Powers JM, Buchanan GR, Adix L, Zhang S, Gao A, McCavit TL. Effect of Low-Dose Ferrous Sulfate vs Iron Polysaccharide Complex on Hemoglobin Concentration in Young Children With Nutritional Iron-Deficiency Anemia: A Randomized Clinical Trial. *JAMA* 2017;317:2297-304.
14. Akman M, Cebeci D, Okur V, Angin H, Abali O, Akman AC. The effects of iron deficiency on infants' developmental test performance. *Acta Paediatrica (Oslo, Norway : 1992)* 2004;93:1391-6.
15. Idjradinata P, Pollitt E. Reversal of developmental delays in iron-deficient anaemic infants treated with iron. *Lancet (London, England)* 1993;341:1-4.
16. Abdullah K, Thorpe KE, Mamak E, et al. Optimizing early child development for young children with non-anemic iron deficiency in the primary care practice setting (OptEC): study protocol for a randomized controlled trial. *Trials* 2015;16:132.

17. Georgieff MK. Iron assessment to protect the developing brain. *The American Journal of Clinical Nutrition* 2017;106:1588s-93s.
18. Oatley H, Borkhoff CM, Chen S, et al. Screening for Iron Deficiency in Early Childhood Using Serum Ferritin in the Primary Care Setting. *Pediatrics* 2018;142.
19. Ontario Ministry of Children, Community and Social Services. Your child's enhanced 18-month well-baby visit.  
[http://www.children.gov.on.ca/htdocs/English/earlychildhood/health/your\\_enhanced\\_18-month.aspx](http://www.children.gov.on.ca/htdocs/English/earlychildhood/health/your_enhanced_18-month.aspx). Accessed February 6, 2019.
20. Williams R, Clinton J. Getting it right at 18 months: In support of an enhanced well-baby visit. *Paediatrics & Child Health* 2011;16:647-54.
21. Cohen AR. Looking Behind the Iron Curtain. *Pediatrics* 2018;142.
22. Basu A, Maciejewski ML. Choosing a Time Horizon in Cost and Cost-effectiveness Analyses. *JAMA* 2019.
23. The Canadian Agency for Drugs and Technologies in Health. Guidelines for the economic evaluation of health technologies: Canada 4th ed. Ottawa: CADTH; 2017 Mar. In: [https://www.cadth.ca/sites/default/files/pdf/guidelines\\_for\\_the\\_economic\\_evaluation\\_of\\_health\\_technologies\\_canada\\_4th\\_ed.pdf](https://www.cadth.ca/sites/default/files/pdf/guidelines_for_the_economic_evaluation_of_health_technologies_canada_4th_ed.pdf), ed.
24. Langer A, Holle R, John J. Specific guidelines for assessing and improving the methodological quality of economic evaluations of newborn screening. *BMC Health Services Research* 2012;12:300.
25. Abdullah K, Thorpe KE, Maguire JL, et al. Risk factors, practice variation and hematological outcomes of children identified with non-anemic iron deficiency following screening in primary care setting. *Paediatrics & Child Health* 2015;20:302-6.
26. Bayoumi I, Parkin PC, Lebovic G, et al. Iron deficiency among low income Canadian toddlers: a cross-sectional feasibility study in a Community Health Centre and non-Community Health Centre sites. *BMC Family Practice* 2018;19:161.
27. Cox KA, Parkin PC, Anderson LN, et al. Association Between Meat and Meat-Alternative Consumption and Iron Stores in Early Childhood. *Academic Pediatrics* 2016;16:783-91.
28. Maguire JL, Lebovic G, Kandasamy S, et al. The relationship between cow's milk and stores of vitamin D and iron in early childhood. *Pediatrics* 2013;131:e144-51.
29. Maguire JL, Salehi L, Birken CS, et al. Association between total duration of breastfeeding and iron deficiency. *Pediatrics* 2013;131:e1530-7.
30. Parkin PC, DeGroot J, Maguire JL, Birken CS, Zlotkin S. Severe iron-deficiency anaemia and feeding practices in young children. *Public Health Nutrition* 2016;19:716-22.
31. Saunders NR, Parkin PC, Birken CS, Maguire JL, Borkhoff CM. Iron status of young children from immigrant families. *Archives of Disease in Childhood* 2016;101:1130-6.
32. Sutcliffe TL, Khambalia A, Westergard S, Jacobson S, Peer M, Parkin PC. Iron depletion is associated with daytime bottle-feeding in the second and third years of life. *Archives of Pediatrics & Adolescent Medicine* 2006;160:1114-20.
33. Sypes EE, Parkin PC, Birken CS, et al. Higher Body Mass Index Is Associated with Iron Deficiency in Children 1 to 3 Years of Age. *The Journal of Pediatrics* 2018.
34. Assessing the iron status of populations: including literature reviews: report of a Joint World Health Organization/Centers for Disease Control and Prevention Technical Consultation on the Assessment of Iron Status at the Population Level, Geneva, Switzerland, 6–8 April 2004. – 2nd ed.

- 1  
2  
3 35. Guyatt GH, Oxman AD, Ali M, Willan A, McIlroy W, Patterson C. Laboratory diagnosis  
4 of iron-deficiency anemia: an overview. *Journal of General Internal Medicine* 1992;7:145-53.  
5 36. Statistics Canada. Life tables, Canada, provinces and territories, catalogue no. 84-537-X.  
6 [https://www150.statcan.gc.ca/n1/pub/84-537-x/2018002/xls/2014-2016\\_Tbl-eng.xlsx](https://www150.statcan.gc.ca/n1/pub/84-537-x/2018002/xls/2014-2016_Tbl-eng.xlsx).  
7 37. Bennett JE, Sumner W, 2nd, Downs SM, Jaffe DM. Parents' utilities for outcomes of  
8 occult bacteremia. *Archives of Pediatrics & Adolescent medicine* 2000;154:43-8.  
9 38. Ekman M, Berg J, Wimo A, Jonsson L, McBurney C. Health utilities in mild cognitive  
10 impairment and dementia: a population study in Sweden. *International Journal of Geriatric*  
11 *Psychiatry* 2007;22:649-55.  
12 39. National Collaborating Centre for Women's and Children's Health (UK). Constipation in  
13 Children and Young People: Diagnosis and Management of Idiopathic Childhood Constipation  
14 in Primary and Secondary Care. London: RCOG Press; 2010. [https://www-ncbi-nlm-nih-](https://www-ncbi-nlm-nih.gov.myaccess.library.utoronto.ca/pubmed/22220325)  
15 [gov.myaccess.library.utoronto.ca/pubmed/22220325](https://www-ncbi-nlm-nih.gov.myaccess.library.utoronto.ca/pubmed/22220325).  
16 40. Ministry of Health and Long-Term Care. Schedule of Benefits for Laboratory Services,  
17 November 7, 2017 (effective April 1, 2017).  
18 [http://www.health.gov.on.ca/en/pro/programs/ohip/sob/lab/lab\\_mn2018.pdf](http://www.health.gov.on.ca/en/pro/programs/ohip/sob/lab/lab_mn2018.pdf).  
19 41. Statistics Canada. Table 18-10-0004-13 Consumer Price Index by product group,  
20 monthly, percentage change, not seasonally adjusted, Canada, provinces, Whitehorse,  
21 Yellowknife and Iqaluit. <https://www150.statcan.gc.ca/t1/tb11/en/tv.action?pid=1810000413>.  
22 42. Ontario Drug Benefit Formulary/Comparative Drug Index. Available from:  
23 <https://www.formulary.health.gov.on.ca/formulary/>.  
24 43. Statistics Canada. Table 14-10-0320-02 Average usual hours and wages by selected  
25 characteristics, monthly, unadjusted for seasonality.  
26 [https://www150.statcan.gc.ca/t1/tb11/en/tv.action?pid=1410032002&pickMembers%5B0%5D=3](https://www150.statcan.gc.ca/t1/tb11/en/tv.action?pid=1410032002&pickMembers%5B0%5D=33)  
27 [3](https://www150.statcan.gc.ca/t1/tb11/en/tv.action?pid=1410032002&pickMembers%5B0%5D=33).  
28 44. Neumann PJ, Cohen JT, Weinstein MC. Updating cost-effectiveness--the curious  
29 resilience of the \$50,000-per-QALY threshold. *The New England Journal of Medicine*  
30 2014;371:796-7.  
31 45. Shaker M, Jenkins P, Ullrich C, Brugnara C, Nghiem BT, Bernstein H. An economic  
32 analysis of anemia prevention during infancy. *The Journal of Pediatrics* 2009;154:44-9.  
33 46. Wang B, Zhan S, Gong T, Lee L. Iron therapy for improving psychomotor development  
34 and cognitive function in children under the age of three with iron deficiency anaemia. *The*  
35 *Cochrane Database of Systematic Reviews* 2013:Cd001444.  
36 47. Conti G, Heckman JJ. The Economics of Child Well-Being. In: Ben-Arieh A, Casas,  
37 Ferran, Frones, Ivar. and Korbin, Jill E., ed. *Handbook of Child Well-Being: Theories, Methods*  
38 *and Policies in Global Perspective*. Dordrecht: Springer-Verlag; 2013:363-402.  
39 48. Conti G, Heckman JJ. The developmental approach to child and adult health. *Pediatrics*  
40 2013;131 Suppl 2:S133-41.  
41 49. Heckman JJ. The developmental origins of health. *Health Economics* 2012;21:24-9.  
42 50. Sanders GD, Maciejewski ML, Basu A. Overview of Cost-effectiveness Analysis. *JAMA*  
43 2019.  
44 51. Sanders GD, Neumann PJ, Basu A, et al. Recommendations for Conduct, Methodological  
45 Practices, and Reporting of Cost-effectiveness Analyses: Second Panel on Cost-Effectiveness in  
46 Health and Medicine. *JAMA* 2016;316:1093-103.  
47 52. Pottie K, Jaramillo A, Lewin G, et al. Recommendations on screening for type 2 diabetes  
48 in adults. *CMAJ : Canadian Medical Association Journal* 2012;184:1687-96.  
49  
50  
51  
52  
53  
54  
55  
56  
57  
58  
59  
60

1  
2  
3 53. Srinivasan B, O'Dell D, Finkelstein JL, Lee S, Erickson D, Mehta S. ironPhone: Mobile  
4 device-coupled point-of-care diagnostics for assessment of iron status by quantification of serum  
5 ferritin. *Biosensors & Bioelectronics* 2018;99:115-21.  
6  
7  
8  
9  
10  
11  
12  
13  
14  
15  
16  
17  
18  
19  
20  
21  
22  
23  
24  
25  
26  
27  
28  
29  
30  
31  
32  
33  
34  
35  
36  
37  
38  
39  
40  
41  
42  
43  
44  
45  
46  
47  
48  
49  
50  
51  
52  
53  
54  
55  
56  
57  
58  
59  
60

Confidential

Table 1: Parameter inputs for the base case scenario

| Parameter                                                           | Base Case                | Data Source/Reasoning                                                                                                                                                        |
|---------------------------------------------------------------------|--------------------------|------------------------------------------------------------------------------------------------------------------------------------------------------------------------------|
| <b>Prevalence of iron deficiency</b>                                |                          |                                                                                                                                                                              |
| General population                                                  | 12.1%                    | OpTEC study data                                                                                                                                                             |
| At-risk population                                                  | 25.0%                    | OpTEC study data                                                                                                                                                             |
| <b>Proportion of at-risk children in the general population</b>     | 35.5%                    | OpTEC study data (2 or more risk factors)                                                                                                                                    |
| <b>Probability of poor functional outcomes</b>                      |                          |                                                                                                                                                                              |
| <b>Untreated</b>                                                    |                          |                                                                                                                                                                              |
| Due to ID                                                           | 23.5%                    | Lozoff et al., 2000                                                                                                                                                          |
| Not due to ID                                                       | 9.5%                     | Idiradinata and Pollitt, 1993                                                                                                                                                |
| <b>After iron supplementation treatment</b>                         |                          |                                                                                                                                                                              |
| Due to ID                                                           | 9.5%                     | Idiradinata and Pollitt, 1993                                                                                                                                                |
| Not due to ID                                                       | 9.5%                     | Idiradinata and Pollitt, 1993                                                                                                                                                |
| <b>Screening test efficiency</b>                                    |                          |                                                                                                                                                                              |
| Sensitivity                                                         | 58.6%                    | Guyatt et al., 1992                                                                                                                                                          |
| Specificity                                                         | 98.9%                    | Guyatt et al., 1992                                                                                                                                                          |
| <b>Utility Parameter Inputs</b>                                     |                          |                                                                                                                                                                              |
| Utility of having iron supplementation treatment (utilityTreat)     | 0.815                    | Accounting for potential sides effects (constipation) of receiving iron supplementation NICE 2010                                                                            |
| Utility of living with poor functional outcomes (utilityPoorFunOut) | 0.84                     | Assuming children will experience utility loss due to cognitive impairment<br>Bennet et al., 2000; Ekman et al., 2007                                                        |
| <b>Costs (CAD)</b>                                                  |                          |                                                                                                                                                                              |
| <b>Universal screening</b>                                          |                          |                                                                                                                                                                              |
| <b>Adjusted lab costs total (uninflated)</b>                        | <b>\$28.48 (\$27.80)</b> | Inflated to present value (January 2019) using the monthly Canadian Consumer Price Index <sup>1</sup>                                                                        |
| Laboratory services                                                 | \$10.67                  | OHIP Schedule of Benefits (CBC, Ferritin, and CRP <sup>2</sup> )                                                                                                             |
| Administration                                                      | \$6.37                   | Ontario Nurse Association (assuming a 10-minutes nursing time) <sup>3</sup>                                                                                                  |
| Patient documentation and specimen collection fee                   | \$10.76                  | OHIP Schedule of Benefits (urban location)                                                                                                                                   |
| <b>Patient-borne cost total</b>                                     | <b>\$116.33</b>          |                                                                                                                                                                              |
| Salary loss                                                         | \$103.21                 | The average weekly wages for Canadians (permanent employees) are \$1,032.12 in January 2019. <sup>4</sup> In the base-case, one parent is assumed to take 0.5-days off work. |
| Travel expense                                                      | \$13.12                  | One parent is driving a conventional                                                                                                                                         |

|                                                   |                          |                                                                                                                                                                                                                                                                                                                                                      |
|---------------------------------------------------|--------------------------|------------------------------------------------------------------------------------------------------------------------------------------------------------------------------------------------------------------------------------------------------------------------------------------------------------------------------------------------------|
|                                                   |                          | vehicle for 15 km (round-trip) to the screening location. Using \$0.96/L for regular gasoline <sup>4</sup> and a fuel consumption level of 7.8 L/100 km <sup>5</sup> , the total cost for gas is \$1.12 per round trip. In the base case, a 2-hour parking time is assumed (parking rate: \$6/hour <sup>6</sup> ) which gives \$12 cost for parking. |
| <b>Total cost, universal screening</b>            | <b>\$144.81</b>          | Lab costs + patient-borne costs                                                                                                                                                                                                                                                                                                                      |
| <b>Targeted screening</b>                         |                          |                                                                                                                                                                                                                                                                                                                                                      |
| <b>Adjusted lab costs total (uninflated)</b>      | <b>\$35.00 (\$34.16)</b> | Inflated to present value (January 2019) using the monthly Canadian Consumer Price Index <sup>1</sup>                                                                                                                                                                                                                                                |
| Laboratory services                               | \$10.67                  | OHIP Schedule of Benefits (CBC, Ferritin, and CRP <sup>2</sup> )                                                                                                                                                                                                                                                                                     |
| Administration                                    | \$12.73                  | Ontario Nurse Association (assuming a 20-minutes nursing time)                                                                                                                                                                                                                                                                                       |
| Patient documentation and specimen collection fee | \$10.76                  | OHIP Schedule of Benefits (urban location)                                                                                                                                                                                                                                                                                                           |
| <b>Patient-borne cost</b>                         | <b>\$116.33</b>          | As above                                                                                                                                                                                                                                                                                                                                             |
| <b>Total cost, targeted screening</b>             | <b>\$151.33</b>          | Lab costs + patient-borne costs                                                                                                                                                                                                                                                                                                                      |
| <b>Treatment cost (CAD)</b>                       |                          |                                                                                                                                                                                                                                                                                                                                                      |
| Ferrous Sulfate – 4 month treatment               | \$170.00                 | \$168.63 including dispensing fee <sup>8</sup>                                                                                                                                                                                                                                                                                                       |

<sup>1</sup>Canadian Consumer Price Index: 130.4 (April 2017); 133.6 (January 2019). Source: Statistics Canada:

<https://www150.statcan.gc.ca/t1/tbl1/en/cv.action?pid=1810000413>

<sup>2</sup>OHIP Schedule of Benefits for Laboratory Services (April 1, 2017): CBC, \$3.98; ferritin, \$2.97; CRP, \$3.72.

<sup>3</sup>Using an hourly rate of \$38.19 (for 5-years full-time registered nurse; effective April 1, 2017). Source: Ontario

Nurse Association: [https://www.ona.org/wp-content/uploads/ona\\_2016hospitalawardhighlights\\_20160912.pdf?x72008](https://www.ona.org/wp-content/uploads/ona_2016hospitalawardhighlights_20160912.pdf?x72008)

<sup>4</sup>Statistics Canada labour statistics:

<https://www150.statcan.gc.ca/t1/tbl1/en/tv.action?pid=1410032002&pickMembers%5B0%5D=3.3>

<sup>5</sup>Ontario gasoline price on Feb 11, 2019: <https://www.ontario.ca/page/motor-fuel-prices>

<sup>6</sup>Fuel consumption ratings by Natural Resources Canada: <http://oee.nrcan.gc.ca/fcr-rcf/public/index-e.cfm> (using the measures of the Honda Civic Coupe, Canada's best-selling car for 21<sup>st</sup> consecutive years)

<sup>7</sup>Parking rate at the Hospital for Sick Children, Toronto, Ontario: <https://www.preciseparklink.com/sick-kids-hospital-parking>

<sup>8</sup>Ontario Drug Benefit Formulary/Comparative Drug Index. Available from:

<https://www.formulary.health.gov.on.ca/formulary/>

Table 2: Calculating effectiveness

| <b>Terminal Node Health State</b>                | <b>Formula</b>                                                                                                    | <b>Reasoning</b>                                                                                                                                                                                             |
|--------------------------------------------------|-------------------------------------------------------------------------------------------------------------------|--------------------------------------------------------------------------------------------------------------------------------------------------------------------------------------------------------------|
| <b>Healthy, Untreated</b>                        | QALYs (healthy, untreat)<br>= RemainLifeExp*1<br>= 80.5                                                           | Assuming screening occurs at 18 months, and health state is experienced for all years following test (using life expectancy of 82 years <sup>1</sup> )                                                       |
| <b>Healthy, After Treatment</b>                  | QALYs (healthy, treat)<br>= (RemainLifeExp - 0.33)<br>+(0.33)*utilityTreat                                        | Assumes there is some decrease in utility for four months during iron supplementation                                                                                                                        |
| <b>Poor functional outcomes, Untreated</b>       | QALYs (poor functional outcomes, untreat)<br>= RemainLifeExp*<br>utilityPoorFunOut                                | Assumes that ID is not detected and treated, and resulting health state is experienced for all years following test                                                                                          |
| <b>Poor functional outcomes, After Treatment</b> | QALYs (poor functional outcomes, treat)<br>= (RemainLifeExp - 0.33)*<br>utilityPoorFunOut<br>+(0.33)*utilityTreat | Assumes that ID is not treated despite supplementation, and this health state experiences both decreased utilities from poor functional outcomes, and short-term decrease in utility due to supplementation. |

<sup>1</sup>Source: Statistics Canada life tables: [https://www150.statcan.gc.ca/n1/pub/84-537-x/2018002/xls/2014-2016\\_Tbl-eng.xlsx](https://www150.statcan.gc.ca/n1/pub/84-537-x/2018002/xls/2014-2016_Tbl-eng.xlsx)

Table 3: Cost-utility analysis results under base case assumptions

| Strategy                                          | Cost   | Effect (QALYs) | Incremental Cost | Incremental Effect (QALYs) | ICER    |
|---------------------------------------------------|--------|----------------|------------------|----------------------------|---------|
| <b>Two Screening Programs vs. No Screening</b>    |        |                |                  |                            |         |
| No Screening                                      | 0      | 23.82          | -                | -                          | -       |
| Targeted Screening                                | 63.06  | 23.86          | 63.06            | 0.04                       | 1676.94 |
| Universal Screening                               | 162.98 | 23.89          | 162.98           | 0.07                       | 2286.06 |
| <b>Universal Screening vs. Targeted Screening</b> |        |                |                  |                            |         |
| Targeted Screening                                | 63.06  | 23.86          | -                | -                          | -       |
| Universal Screening                               | 162.98 | 23.89          | 99.92            | 0.03                       | 2965.96 |



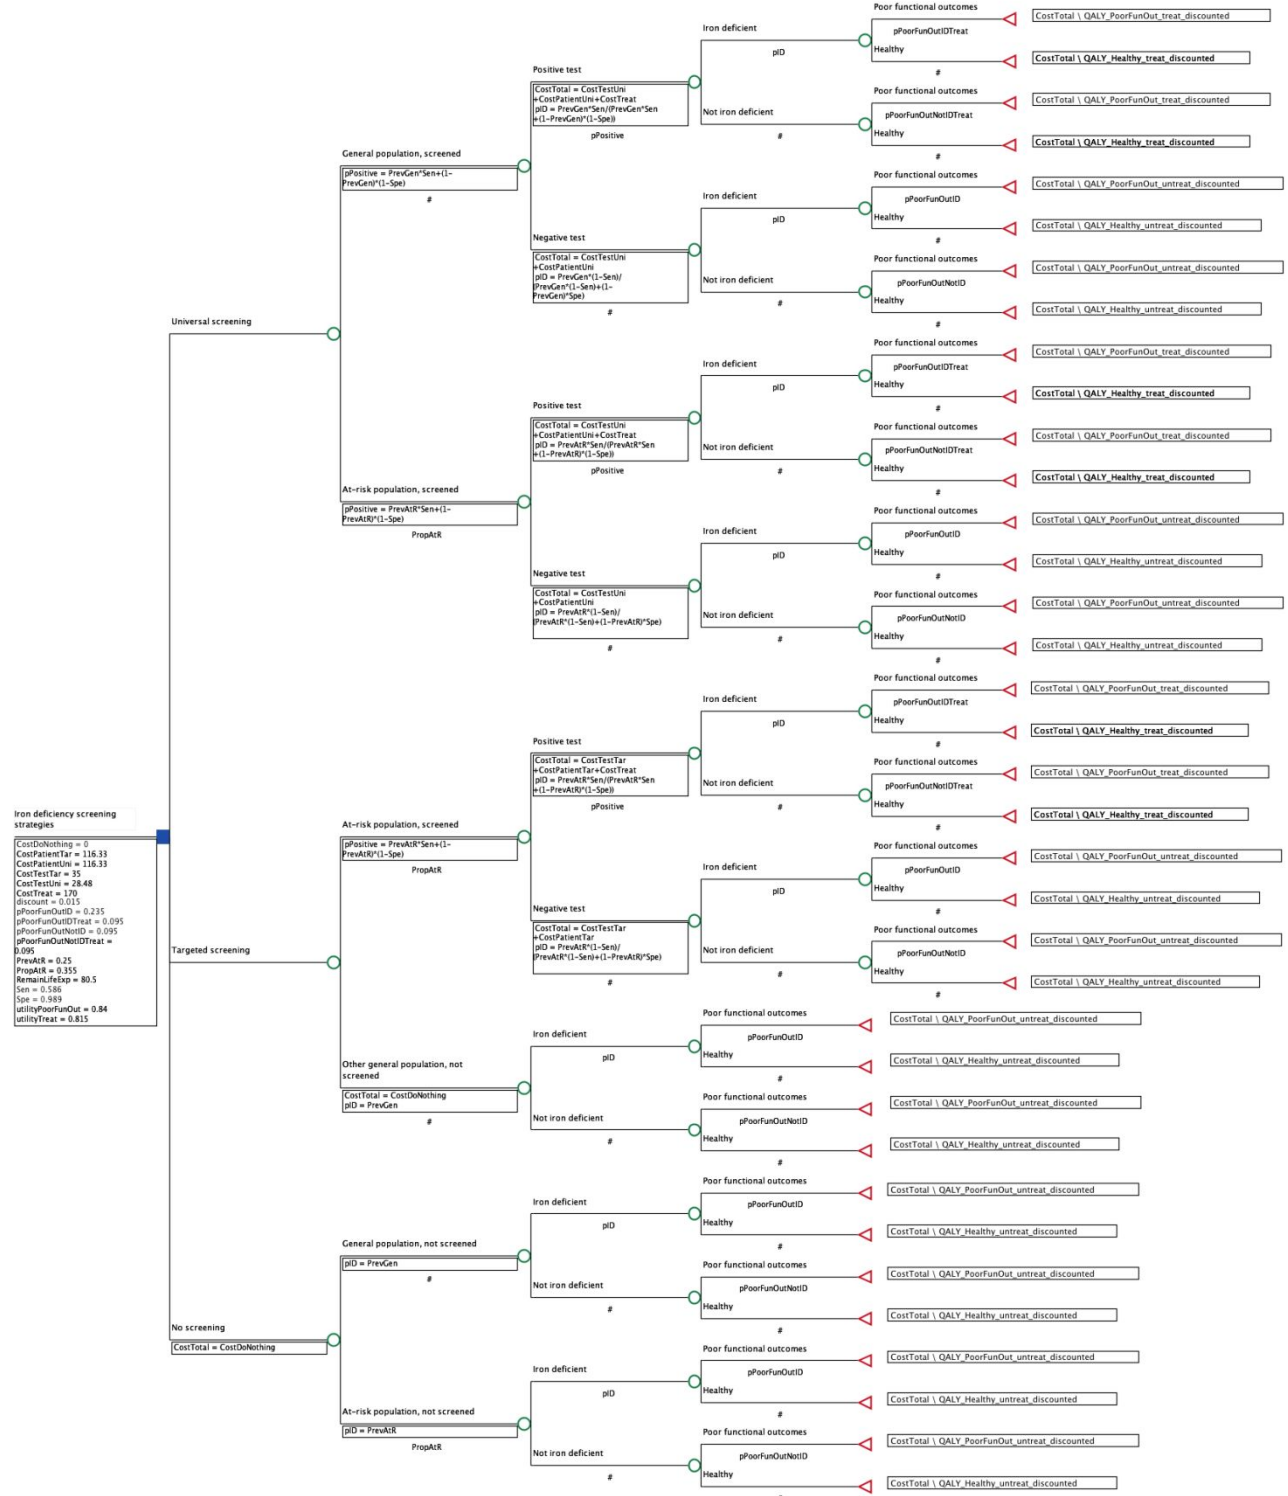

Figure 1: Decision Tree

1  
2  
3  
4  
5  
6  
7  
8  
9  
10  
11  
12  
13  
14  
15  
16  
17  
18  
19  
20  
21  
22  
23  
24  
25  
26  
27  
28  
29  
30  
31  
32  
33  
34  
35  
36  
37  
38  
39  
40  
41  
42  
43  
44  
45  
46  
47  
48  
49  
50  
51  
52  
53  
54  
55  
56  
57  
58  
59  
60

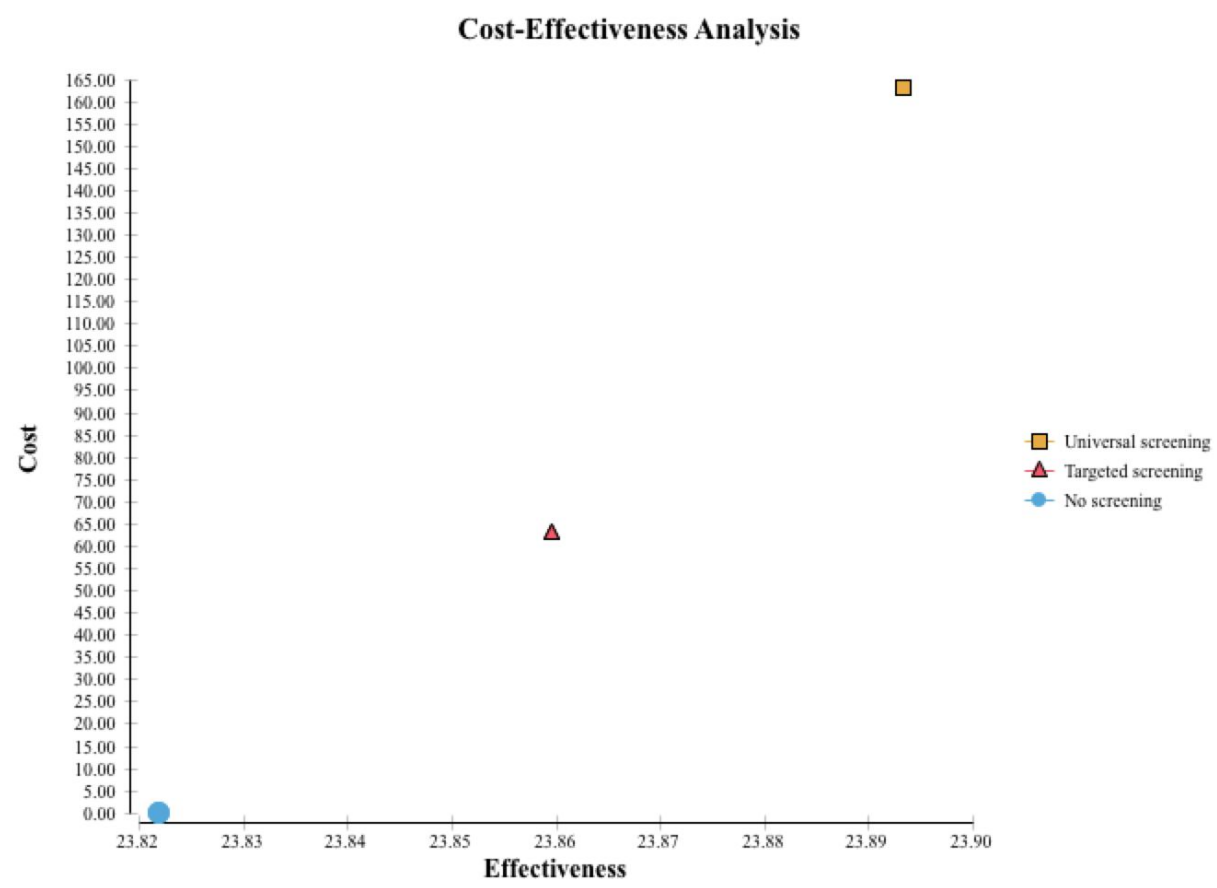

Figure 2: Cost-Effectiveness Plane for Three Screening Strategies

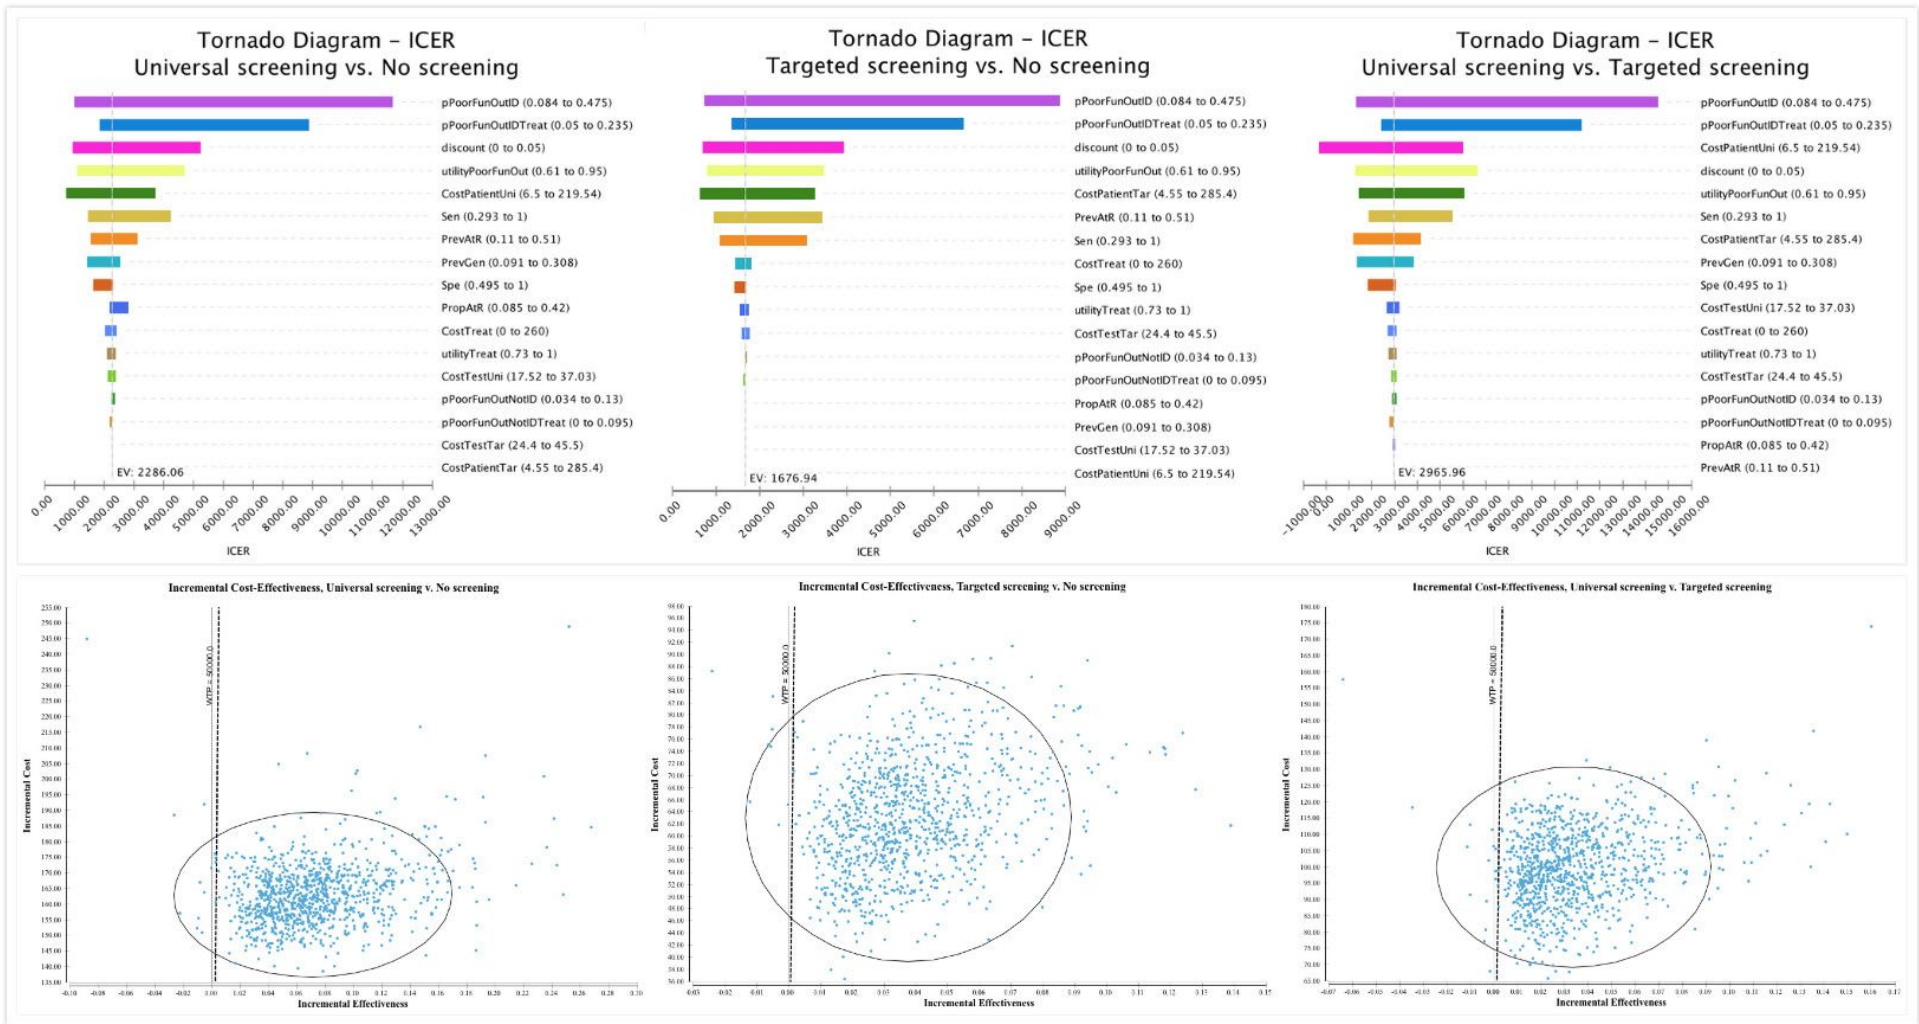

Figure 3: Top: One-way sensitivity analyses comparing universal screening vs. no screening, targeted vs. no screening, and universal vs. targeted screening. Bottom: Probabilistic sensitivity analyses results (from left to right) comparing universal screening vs. no screening, targeted vs. no screening, and universal vs. targeted screening

Supplemental Table 1: Sensitivity analyses model inputs

|                                                                         | Base case                                      | Low estimate                                | High estimate                                           |
|-------------------------------------------------------------------------|------------------------------------------------|---------------------------------------------|---------------------------------------------------------|
| <b>Disease prevalence</b>                                               |                                                |                                             |                                                         |
| <b>Iron deficiency, general</b>                                         | 0.121                                          | 0.091                                       | 0.308                                                   |
| Data Source                                                             | <12mg/L, from Target Kids! Unpublished data    | Maguire et al., 2013                        | <18mg/L, from Target Kids! Unpublished data             |
| <b>Iron deficiency, at-risk</b>                                         | 0.250                                          | 0.11                                        | 0.51                                                    |
| Data Source                                                             | <12mg/L, from Target Kids! Unpublished data    | <12mg/L, from Target Kids! Unpublished data | <18mg/L, from Target Kids! Unpublished data             |
| <b>Probability of poor functional outcomes</b>                          |                                                |                                             |                                                         |
| <b>Due to ID, untreated</b>                                             | 0.235                                          | 0.084                                       | 0.475                                                   |
| Data Source                                                             | Lozoff et al., 2000                            | <18mg/L, from Target Kids! Unpublished data | Carroll & Downs, 2006*                                  |
| <b>Not ID, untreated</b>                                                | 0.095                                          | 0.034                                       | 0.13                                                    |
| Data Source                                                             | Idiradinata and Pollitt, 1993                  | Simpson et al, 2003 <sup>†</sup>            | Rosenberg et al., 2008 <sup>‡</sup>                     |
| <b>After iron supplement treatment, not ID</b>                          | 0.095                                          | 0                                           | 0.095                                                   |
| Data Source                                                             | Idiradinata and Pollitt, 1993                  | Expert opinion                              | Idiradinata and Pollitt, 1993                           |
| <b>After iron supplement treatment, ID</b>                              | 0.095                                          | 0.05                                        | 0.235                                                   |
| Data Source                                                             | Idiradinata and Pollitt, 1993                  | Idiradinata and Pollitt, 1993               | Lozoff et al., 2000                                     |
| <b>Proportion of at-risk children in the targeted screening program</b> |                                                |                                             |                                                         |
| <b>Proportion of at-risk children</b>                                   | 0.355                                          | 0.085                                       | 0.42                                                    |
| Data Source                                                             | OpTEC trial; 2 or more risk factors            | OpTEC Trial; 3 or more risk factors         | OpTEC Trial; 1 risk factor                              |
| <b>Test accuracy</b>                                                    |                                                |                                             |                                                         |
| <b>Sensitivity</b>                                                      | 0.586                                          | 0.293                                       | 1                                                       |
| Data Source                                                             | Guyatt et al., 1992                            | Base case * 0.5                             | -                                                       |
| <b>Specificity</b>                                                      | 0.989                                          | 0.495                                       | 1                                                       |
| Data Source                                                             | Guyatt et al., 1992                            | Base case * 0.5                             | -                                                       |
| <b>Cost (\$)</b>                                                        |                                                |                                             |                                                         |
| <b>Total test cost, universal screening program</b>                     | 28.48                                          | 17.52                                       | 37.03                                                   |
| Data Source                                                             | include CRP, Ferritin, and CBC; urban location | w/o CBC or CRP; pick-up only                | base case * 1.3, to include the base case targeted cost |

|    |                                                        |                                                         |                                         |                                                   |
|----|--------------------------------------------------------|---------------------------------------------------------|-----------------------------------------|---------------------------------------------------|
| 1  | <b>Total test cost, targeted screening program</b>     | 35.00                                                   | 24.04                                   | 45.50                                             |
| 2  | Data Source                                            | include CRP, Ferritin, and CBC; urban                   | w/o CBC or CRP; pick-up only            | base case * 1.3                                   |
| 3  |                                                        |                                                         |                                         |                                                   |
| 4  | <b>Total treatment cost</b>                            | 170.00                                                  | 0                                       | 260.00                                            |
| 5  | Data Source                                            | Prescription price (including dispensing fee): \$168.63 | Ontario Drug Benefit program            | Over-the-counter price (including tax): \$259.79  |
| 6  |                                                        |                                                         |                                         |                                                   |
| 7  | <b>Patient-borne cost, universal screening program</b> | 116.33                                                  | 6.5                                     | 219.54                                            |
| 8  | Data Source                                            | Driving, 1/2 day off                                    | Using the TTC (roundtrip), no day off   | Driving, full-day off                             |
| 9  | <b>Patient-borne cost, targeted screening program</b>  | 116.33                                                  | 4.55                                    | 285.40                                            |
| 10 |                                                        |                                                         |                                         |                                                   |
| 11 | Data Source                                            | same with base case universal screen                    | Low estimate for universal screen * 0.7 | High estimate for universal screen * 1.3          |
| 12 |                                                        |                                                         |                                         |                                                   |
| 13 |                                                        |                                                         |                                         |                                                   |
| 14 |                                                        |                                                         |                                         |                                                   |
| 15 | <b>Utility measures</b>                                |                                                         |                                         |                                                   |
| 16 | <b>Utility of living with poor functional outcomes</b> | 0.84                                                    | 0.61                                    | 0.95                                              |
| 17 | Data Source                                            | Ekman et al., 2007                                      | Ekman et al., 2007                      | Ekman et al., 2007                                |
| 18 |                                                        |                                                         |                                         |                                                   |
| 19 | <b>Utility of having iron supplementation (4-mo)</b>   | 0.815                                                   | 0.73                                    | 1                                                 |
| 20 | Data Source                                            | Considering utility loss by constipation, NICE 2010     | base case * 0.9                         | No change in life quality during the 4-month time |
| 21 |                                                        |                                                         |                                         |                                                   |
| 22 |                                                        |                                                         |                                         |                                                   |
| 23 |                                                        |                                                         |                                         |                                                   |
| 24 | <b>Discounting rate</b>                                |                                                         |                                         |                                                   |
| 25 | <b>Discounting rate</b>                                | 0.015                                                   | 0                                       | 0.05                                              |
| 26 | Data Source                                            | CADTH                                                   | undiscounted                            | expert opinion                                    |
| 27 |                                                        |                                                         |                                         |                                                   |

\*Carroll AE, Downs SM. Comprehensive cost-utility analysis of newborn screening strategies. *Pediatrics*. 2006;117(5 Pt 2):S287-95.

†Simpson GA, Colpe L, Greenspan S. Measuring functional developmental delay in infants and young children: prevalence rates from the NHIS-D. *Paediatric and perinatal epidemiology*. 2003;17(1):68-80.

‡Rosenberg SA, Zhang D, Robinson CC. Prevalence of developmental delays and participation in early intervention services for young children. *Pediatrics*. 2008;121(6):e1503-9.

Supplemental Table 2: Parameter Distributions for Probability Sensitivity Analyses

| Parameter                                                     | Variable Name         | Point Estimate | Probability Distribution |
|---------------------------------------------------------------|-----------------------|----------------|--------------------------|
| <b>Costs</b>                                                  |                       |                |                          |
| Cost of test, universal screen                                | CostTestUni           | 28.48          | Gamma                    |
| Cost of test, targeted screen                                 | CostTestTar           | 35.00          |                          |
| Patient-borne, universal screen                               | CostPatientUni        | 116.33         |                          |
| Patient-borne, targeted screen                                | CostPatientTar        | 116.33         |                          |
| Cost of treatment                                             | CostTreat             | 170.00         |                          |
| <b>Prevalence of ID</b>                                       |                       |                |                          |
| General population                                            | PrevGen               | 0.121          | Beta                     |
| At-risk population                                            | PrevAtR               | 0.25           |                          |
| <b>Proportion of children included in the targeted screen</b> | PropAtR               | 0.355          | Beta                     |
| <b>Probability of developing poor functional outcomes</b>     |                       |                |                          |
| Due to ID, untreated                                          | pPoorFunOut           | 0.235          | Beta                     |
| Not due to ID, untreated                                      | pPoorFunOutNotID      | 0.095          |                          |
| Due to ID, treated                                            | pPoorFunOutIDTreat    | 0.095          |                          |
| Not due to ID, treated                                        | pPoorFunOutNotIDTreat | 0.095          |                          |
| <b>Test efficacy</b>                                          |                       |                |                          |
| Sensitivity                                                   | Sen                   | 0.586          | Beta                     |
| Specificity                                                   | Spe                   | 0.989          |                          |
| <b>Utility</b>                                                |                       |                |                          |
| Living with poor functional outcomes                          | utilityPoorFunOut     | 0.84           | Beta                     |
| Having iron supplementation treatment                         | utilityTreat          | 0.815          |                          |
